# Supplementary material for: Decompressive craniectomy in the management of intracranial hypertension after traumatic brain injury: a systematic review and meta-analysis
Source: PubMed Central journal article supplement (PMC5562822; doi:10.1038/s41598-017-08959-y), 2017-08-18
Supplement: 41598_2017_8959_MOESM1_ESM.pdf [file 41598_2017_8959_MOESM1_ESM.pdf]

**Title:** Decompressive craniectomy in the management of intracranial hypertension after traumatic brain injury: a systematic review and meta-analysis.

**Author list**

Danfeng Zhang<sup>1</sup>, Qiang Xue<sup>1</sup>, Jigang Chen<sup>1</sup>, Yan Dong, Lijun Hou, Ying Jiang\*, Junyu Wang\*

Supplementary Figure 1: Risk of bias for RCTs

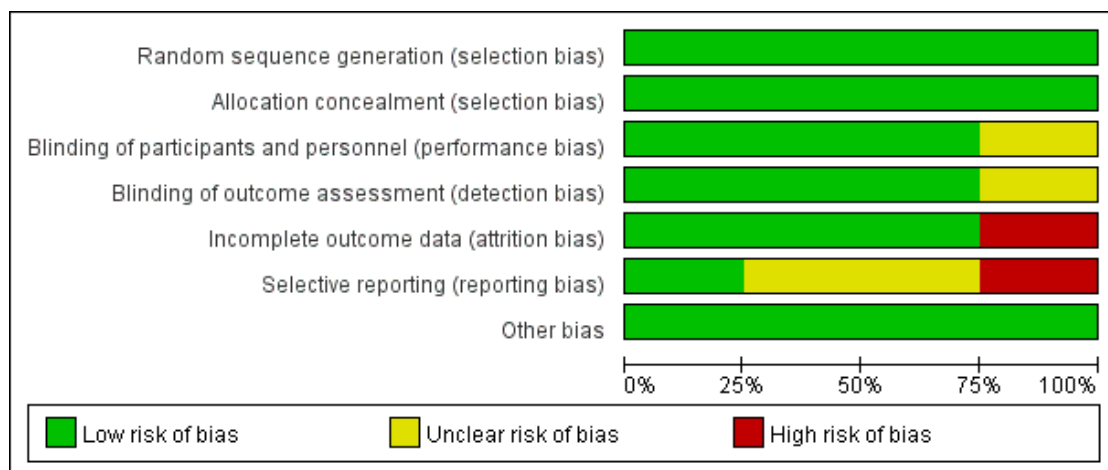

Supplementary Figure 2: Risk of bias summary for RCTs.

|                 | Random sequence generation (selection bias) | Allocation concealment (selection bias) | Blinding of participants and personnel (performance bias) | Blinding of outcome assessment (detection bias) | Incomplete outcome data (attrition bias) | Selective reporting (reporting bias) | Other bias |
|-----------------|---------------------------------------------|-----------------------------------------|-----------------------------------------------------------|-------------------------------------------------|------------------------------------------|--------------------------------------|------------|
| Cooper 2011     | +                                           | +                                       | +                                                         | +                                               | +                                        | -                                    | +          |
| Hutchinson 2016 | +                                           | +                                       | +                                                         | +                                               | -                                        | +                                    | +          |
| Qiu 2009        | +                                           | +                                       | +                                                         | +                                               | +                                        | ?                                    | +          |
| Taylor 2001     | +                                           | +                                       | ?                                                         | ?                                               | +                                        | ?                                    | +          |
